# Supplementary material for: Transforming waste fish bones into nanoparticles with ultrasound and aqueous organic acids
Source: Royal Society of Chemistry journal article supplement (doi:10.1039/d5su00164a), 2025-01-01
Supplement: d5su00164a2.xlsx [file d5su00164a2.xlsx]

## Sheet: LCA
Assumed data for all compounds			Our method
Volume air (m3)	10000000000		Chemicals used	mass (g)	MW (g mol-1)	H	Kow	Koc	SFP	Cp (kJ g-1 K-1)	Z(air)	Z(water)	Z(soil)	Z(sediment)	Fugacity	C(air)	C(water)	LC50	LD50	INHTP	INGTP
Volume water (m3)	7000000		Water	2000	18.02				0	0.00418
Volume soil (m3)	9000			1000
Volume sediemnt (m3)	20000		Neutrase	1.5	22500	1e-50	3	1.23	0		41	1e+50	3.69e+48	7.38e+48	6.34757e-59	Not volatile	6.34757e-09	Not volatile	2000	Not volatile	0.512268
Density soil (tonnes m-3)	1.5		Lipozyme CALB L	0.75	39500	1e-50	3	1.23	0		41	1e+50	3.69e+48	7.38e+48	6.35e-59	Not volatile	6.35e-09	Not volatile	27000	Not volatile	0.0379604
Density sediment (tonnes m-3)	1.5		Propanoic acid	1	74.08	3.85e-06	1.995	0.81795	0.79		41	259740	6373.64	6373.64	6.05776e-12	2.48368e-10	1.57345e-06	19.7	3455	4.89286e-09	0.00543625
Organic soil fraction	0.02
Organic sediment fraction	0.04		1. Acidification potential			4. Toxic Inhalation
Energy consumption (g CO2 kJ-1)	0.042		I(AP)	0		I(INHT)	4.89286e-09
Toluene concentrations for toxicity potentials			2. Smog formation			5. Toxic ingestion
MW (g mol-1)	92.14		I(SF)	0		I(INGT)	0.773839
H (atm m3 mol-1)	0.0067
log(Kow)	2.73		3. Global warming			6. Persistance
Koc	220		Emissions	0		PER	NO
LD50 (mg kg-1)	636		Energy consumption
LC50	49		a. Boiling water	1337.6		7. Bioaccumulation
Z(air)	41		b. Enzyme treatment	1003.2		ACCU	0.390935
Z(water)	149.254		c. Ball-mill	900
Z(soil)	985.075		d. Ultrasound	40.876		8. Abiotic depletion
Z(sediment)	1970.15		CO2 emissions	137.83		I(AD)	0
Fugacity	2.64005e-11		I(GW)	137.83
C(air)	1.08242e-09
C(water)	3.94037e-09		Sharifianjazi et al.
Energy assumptions (not including sample heating)			Chemicals used	mass (g)	MW (g mol-1)	H	Kow	Koc	SFP	Cp (kJ g-1 K-1)	Z(air)	Z(water)	Z(soil)	Z(sediment)	Fugacity	C(air)	C(water)	LC50	LD50	INHTP	INGTP
Energy to heat 100 - 250 C oven, ramping (kWh)	1.071		Water	1000	18.02				0	0.00418
Energy to heat 100 - 250 C oven, holding (kWh)	0.34
Energy for 250 - 1000 C oven, ramping (kWh)	11.16		1. Acidification potential			4. Toxic Inhalation
Energy for 250 - 1000 C oven, holding (kWh)	4.36		I(AP)	0		I(INHT)	0
Energy for ball mill (kWh)	0.25
			2. Smog formation			5. Toxic ingestion
			I(SF)	0		I(INGT)	0
			3. Global warming			6. Persistance
			Emissions	0		PER	NO
			Energy consumption
			a. Boiling water	1337.6		7. Bioaccumulation
			b. Annealing	86834.9		ACCU	0.390935
			c. Ball-mill	1800
			d. Drying	11979.9		8. Abiotic depletion
			CO2 emissions	4282		I(AD)	0
			I(GW)	4282
			Biazar et al.
			Chemicals used	mass (g)	MW (g mol-1)	H	Kow	Koc	SFP	Cp (kJ g-1 K-1)	Z(air)	Z(water)	Z(soil)	Z(sediment)	Fugacity	C(air)	C(water)	LC50	LD50	INHTP	INGTP
			Water	1000	18.02				0	0.00418
			Acetone	10	58.08	3.97e-05	0.575	5.37	0.180645	0.00214	41	25188.9	4057.93	8115.87	2.93555e-11	1.20358e-09	1.19123e-07	76	5800	0.716903	3.31503
			NaOH	10	40	1e-50		0	0		41	1e+50	0	0	3.57143e-56	1.46429e-54	3.57143e-06	Not volatile	340	Not volatile	1695.44
			1. Acidification potential			4. Toxic Inhalation
			I(AP)	0		I(INHT)	7.16903
			2. Smog formation			5. Toxic ingestion
			I(SF)	1.80645		I(INGT)	16987.6
			3. Global warming			6. Persistance
			Emissions	0		PER	NO
			Energy consumption
			a. Drying	30339.9		7. Bioaccumulation
			b. Calcination	133147		ACCU	0.240332
			c. Ball-mill	900
			CO2 emissions	6904.24		8. Abiotic depletion
			I(GW)	6904.24		I(AD)	0
			Venkatesan et al.
			Chemicals used	mass (g)	MW (g mol-1)	H	Kow	Koc	SFP	Cp (kJ g-1 K-1)	Z(air)	Z(water)	Z(soil)	Z(sediment)	Fugacity	C(air)	C(water)	LC50	LD50	INHTP	INGTP
			Water	2000	18.02				0	0.00418
				1000
				500
				100
			Acetone	7.85	58.08	3.97e-05	0.575	5.37	0.180645	0.00214	41	25188.9	4057.93	8115.87	2.93555e-11	1.20358e-09	1.19123e-07	76	5800	0.716903	3.31503
			NaOH	10	40	1e-50		0	0		41	1e+50	0	0	3.57143e-56	1.46429e-54	3.57143e-06	Not volatile	340	Not volatile	1695.44
				8
			1. Acidification potential			4. Toxic Inhalation
			I(AP)	0		I(INHT)	5.62769
			2. Smog formation			5. Toxic ingestion
			I(SF)	1.41806		I(INGT)	51650
			3. Global warming			6. Persistance
			Emissions	0		PER	MOD
			Energy consumption
			a. Boiling water	9028.8		7. Bioaccumulation
			b. Boiling water	2675.2		ACCU	0.240332
			c. 2%NaOH/acetone	334.4
			d. Drying	4635.9		8. Abiotic depletion
			e. Alkaline treatment	150.48		I(AD)	0
			f. Drying	4635.9
			CO2 emissions	901.349
			I(GW)	901.349
			Yamamura et al.
			Chemicals used	mass (g)	MW (g mol-1)	H	Kow	Koc	SFP	Cp (kJ g-1 K-1)	Z(air)	Z(water)	Z(soil)	Z(sediment)	Fugacity	C(air)	C(water)	LC50	LD50	INHTP	INGTP
			NaOH (1 N)*	200	40	1e-50		0	0		41	1e+50	0	0	3.57143e-56	1.46429e-54	3.57143e-06	Not volatile	340	Not volatile	1695.44
			Hydrogen peroxide (30%)*	150	34	1.08e-08	0.027	5.37	0		41	9.25926e+07	1.49167e+07	2.98333e+07	4.52984e-14	1.85723e-12	4.1943e-06	2000	910	3.71447e-09	0.00381681
			1. Acidification potential			4. Toxic Inhalation
			I(AP)	0		I(INHT)	5.5717e-07
			2. Smog formation			5. Toxic ingestion
			I(SF)	0		I(INGT)	339089
			3. Global warming			6. Persistance
			Emissions	0		PER	NO
			Energy consumption
			a. Calcination	130709		7. Bioaccumulation
			CO2 emissions	5489.77		ACCU	-1.56864
			I(GW)	5489.77
						8. Abiotic depletion
						I(AD)	0

## Sheet: Oven kWh
Oven power
Model:	Carbolite-Gero ELF 11/6	Carbolite Gero ELF 11/14	Carbolite Gero ELF 11/23		Average	Normalized to 50 L
Max volume (L)	6	14	23		14.3333	50
Max power (kWh):	2	2.6	5		3.2	11.1628
Holding power (kWh):	0.9	1.3	1.55		1.25	4.36047
Model:	Carbolite-Gero AX 30	Carbolite-Gero AX 60	Carbolite-Gero AX 120		Average	Normalized to 50 L
Max volume (L)	30	60	120		70	50
Max power (kWh):	1	1.5	2		1.5	1.07143
Holding power (kWh):	0.342	0.465	0.622		0.476333	0.340238
